# Supplementary material
Source: bioRxiv or medRxiv preprint supplement (https://www.biorxiv.org/highwire/filestream/48474/field_highwire_adjunct_files/0/162875-1.pdf)
Supplement: Supplementary file [file 162875-1.pdf]

# Network Curvature as a Hallmark of Brain Structural Connectivity

## SUPPLEMENTARY NOTES

### Supplementary Note 1

Nodes (cortical areas) with high curvature, strength and betweenness centrality from the high resolution (998 x 998) connectivity matrices from Hagmann et al. 2008 (PLoS Biology). The tables below list the top 25% of nodes appearing in 3 (or more) participants out of 5, with the highest curvature, strength and centrality. Cortical areas **only** found by curvature are highlighted in red.

| Node Curvature                                 |                               |
|------------------------------------------------|-------------------------------|
| High resolution matrices (Hagmann et al. 2008) |                               |
| Left Hemisphere                                | Right Hemisphere              |
| Lateral orbito-frontal                         |                               |
| <b>Pars orbitalis</b>                          | <b>Pars orbitalis</b>         |
| Pars triangularis                              | Pars triangularis             |
| <b>Pars opercularis</b>                        | <b>Pars opercularis</b>       |
| <b>Rostral middle-frontal</b>                  | <b>Rostral middle-frontal</b> |
| Superior frontal                               | Superior frontal              |
| Caudal middle-frontal                          | Caudal middle-frontal         |
| Precentral                                     | Precentral                    |
|                                                | Isthmus cingulate             |
| Rostral anterior cingulate                     |                               |
| Caudal anterior cingulate                      |                               |
| Posterior cingulate                            |                               |
| Postcentral                                    |                               |
| Superior parietal                              | Superior parietal             |
| Inferior parietal                              | Inferior parietal             |
| Precuneus                                      | Precuneus                     |
| Cuneus                                         |                               |
| Pericalcarine                                  |                               |
| Lateral occipital                              | Lateral occipital             |
|                                                | Fusiform                      |
| <b>Lingual</b>                                 |                               |
| Inferior temporal                              | <b>Inferior temporal</b>      |
| Superior temporal                              | Superior temporal             |
|                                                | Transverse temporal           |

| Node Betweenness Centrality                    |                               |
|------------------------------------------------|-------------------------------|
| High resolution matrices (Hagmann et al. 2008) |                               |
| Left Hemisphere                                | Right Hemisphere              |
| Lateral orbito-frontal                         | Lateral orbito-frontal        |
| Medial orbito-frontal                          |                               |
| Pars triangularis                              | Pars triangularis             |
| Superior frontal                               | Superior frontal              |
| Caudal middle-frontal                          | Caudal middle-frontal         |
| Precentral                                     | Precentral                    |
| Caudal anterior cingulate                      | Caudal anterior cingulate     |
| Posterior cingulate                            | Posterior cingulate           |
| Isthmus cingulate                              |                               |
| Postcentral                                    |                               |
| Superior parietal                              | Superior parietal             |
| Inferior parietal                              |                               |
| Precuneus                                      | Precuneus                     |
| Cuneus                                         | Cuneus                        |
| Pericalcarine                                  | Pericalcarine                 |
| Lateral occipital                              | Lateral occipital             |
| Superior temporal                              |                               |
|                                                | Supra-marginal                |
|                                                | Inferior temporal             |
|                                                | Middle temporal               |
|                                                | Banks of sup. temporal sulcus |

| <b>Node Strength</b>                          |                               |
|-----------------------------------------------|-------------------------------|
| High resolution matrices (Hagmann et al 2008) |                               |
| <b>Left Hemisphere</b>                        | <b>Right Hemisphere</b>       |
| Medial orbito-frontal                         |                               |
| Superior frontal                              | Superior frontal              |
| Precentral                                    | Precentral                    |
|                                               | Paracentral                   |
|                                               | Caudal anterior cingulate     |
| Posterior cingulate                           | Posterior cingulate           |
| Isthmus cingulate                             | Isthmus cingulate             |
| Postcentral                                   | Postcentral                   |
| Superior parietal                             | Superior parietal             |
| Inferior parietal                             | Inferior parietal             |
| Precuneus                                     | Precuneus                     |
| Cuneus                                        | Cuneus                        |
| Pericalcarine                                 | Pericalcarine                 |
| Lateral occipital                             | Lateral occipital             |
| Inferior temporal                             |                               |
| Middle temporal                               | Middle temporal               |
| Banks of sup. temporal sulcus                 | Banks of sup. temporal sulcus |
|                                               | Superior temporal             |
|                                               | Transverse temporal           |

## Supplementary Note 2

Nodes (cortical/sub-cortical areas) with high curvature, strength and betweenness centrality from the lower resolution (116 x 116) connectivity matrices generated from the MGH-USC HCP Consortium DSI datasets. The tables below list the top 25% of nodes appearing in 18 (or more) participants out of 33, with the highest curvature, strength and centrality. Cortical areas **only** found by curvature are highlighted in red.

| Node Curvature<br>Lower resolution matrices (MGH-USC HCP) |                          |
|-----------------------------------------------------------|--------------------------|
| Left Hemisphere                                           | Right Hemisphere         |
| Precentral                                                | Precentral               |
| Superior frontal                                          | Superior frontal         |
| Middle frontal                                            | Middle frontal           |
| <b>Pars opercularis</b>                                   | <b>Pars opercularis</b>  |
| Pars triangularis                                         | Pars triangularis        |
|                                                           | Supplementary motor area |
| Medial frontal                                            | Medial frontal           |
| <b>Heschl's gyrus</b>                                     | <b>Heschl's gyrus</b>    |
|                                                           | Hippocampus              |
|                                                           | Lingual                  |
|                                                           | Caudate                  |
|                                                           | Putamen                  |
| Pallidum                                                  |                          |

| Node Betweenness Centrality<br>Lower resolution matrices (MGH-USC HCP) |                   |
|------------------------------------------------------------------------|-------------------|
| Left Hemisphere                                                        | Right Hemisphere  |
| Superior frontal                                                       | Superior frontal  |
| Middle frontal                                                         | Middle frontal    |
| Pars triangularis                                                      | Pars triangularis |
| Supplementary motor area                                               |                   |
| Medial frontal                                                         | Medial frontal    |
|                                                                        | Fusiform          |
| Cerebellum                                                             | Cerebellum        |

| Node Strength<br>Lower resolution matrices (MGH-USC HCP) |                          |
|----------------------------------------------------------|--------------------------|
| Left Hemisphere                                          | Right Hemisphere         |
| Precentral                                               | Precentral               |
| Superior frontal                                         | Superior frontal         |
| Middle frontal                                           | Middle frontal           |
| Pars triangularis                                        | Pars triangularis        |
| Supplementary motor area                                 | Supplementary motor area |
| Medial frontal                                           | Medial frontal           |
|                                                          | Fusiform                 |
| Superior parietal                                        | Superior parietal        |
| Pallidum                                                 | Pallidum                 |
| Cerebellum                                               | Cerebellum               |

### **Supplementary Note 3**

Nodes (cortical/sub-cortical areas) with significant change (uncorrected  $p$  value < 0.05 for exploratory results) between age 8-9 (6 subjects) and 65-75 (5 subjects) as detected by curvature, strength and betweenness centrality using lower resolution (116 x 116) connectivity matrices generated with data from the WU-Minn HCP Consortium Lifespan Pilot project.

| <b>Node Curvature (WU-Minn HCP Lifespan)</b> |                          |
|----------------------------------------------|--------------------------|
| <b>Left Hemisphere</b>                       | <b>Right Hemisphere</b>  |
| Supplementary motor area                     | Supplementary motor area |
| Pallidum                                     | Pallidum                 |
| Parahippocampal                              | Parahippocampal          |
| Precuneus                                    | Precuneus                |
| Paracentral Lobule                           | Paracentral Lobule       |
| Thalamus                                     | Thalamus                 |
| Cerebellum                                   | Cerebellum               |
| Heschl's gyrus                               | Caudate                  |
| Superior temporal gyrus                      | Rectus                   |
| Middle temporal pole                         | Pars triangularis        |
| Hippocampus                                  |                          |

| <b>Node Strength (WU-Minn HCP Lifespan)</b> |                          |
|---------------------------------------------|--------------------------|
| <b>Left Hemisphere</b>                      | <b>Right Hemisphere</b>  |
| Supplementary motor area                    | Supplementary motor area |
| Pallidum                                    | Pallidum                 |
| Anterior cingulate gyrus                    | Rectus                   |
| Fusiform                                    | Mid-cingulate area       |
| Putamen                                     | Medial frontal gyrus     |
| Middle temporal pole                        | Postcentral              |
|                                             | Caudate                  |
|                                             | Supra-marginal           |
|                                             | Thalamus                 |
|                                             | Cerebellum               |
|                                             | Precentral               |
|                                             | Pars orbitalis           |
|                                             | Rolandic operculum       |

#### **Supplementary Note 4**

Nodes (cortical/sub-cortical areas) with significant difference (uncorrected  $p$  value < 0.05 for exploratory results) between 51 individuals with Autism Spectrum Disorders and 43 typically developing subjects, as detected by curvature, strength and betweenness centrality using connectivity matrices (264x264) from Rudie et al. 2013 (Neuroimage: Clinical).

| <b>Node Curvature (Rudie et al. 2013)</b> |                                             |
|-------------------------------------------|---------------------------------------------|
| <b>Left Hemisphere</b>                    | <b>Right Hemisphere</b>                     |
| Juxtapositional lobule                    | Inferior temporal gyrus (temporo-occipital) |
|                                           | Temporal occipital fusiform cortex          |
|                                           | Parahippocampal gyrus (posterior)           |
|                                           | Cuneus cortex                               |
|                                           | Supra-marginal gyrus (posterior)            |
|                                           | Insular cortex                              |
|                                           | Frontal orbital cortex                      |
|                                           | Frontal pole                                |

| <b>Node Strength (Rudie et al. 2013)</b> |                                   |
|------------------------------------------|-----------------------------------|
| <b>Left Hemisphere</b>                   | <b>Right Hemisphere</b>           |
| Thalamus                                 | Thalamus                          |
| Precentral gyrus                         | Precentral gyrus                  |
| Superior parietal lobule                 | Superior parietal lobule          |
| Superior frontal gyrus                   | Putamen                           |
|                                          | Middle temporal gyrus (posterior) |
| Cingulate gyrus (anterior)               | Angular gyrus                     |
| Temporal pole                            | Occipital pole                    |
| Postcentral gyrus                        | Juxtapositional lobule            |
|                                          | Crus-II                           |
| Cingulate gyrus (posterior)              | Precuneus cortex                  |
| Occipital fusiform gyrus                 | Precuneus cortex                  |
| Central opercular cortex                 |                                   |
| Middle temporal gyrus (anterior)         |                                   |
| Insular cortex                           |                                   |

| <b>Betweenness Centrality (Rudie et al. 2013)</b> |                                     |
|---------------------------------------------------|-------------------------------------|
| <b>Left Hemisphere</b>                            | <b>Right Hemisphere</b>             |
| Paracingulate gyrus                               | Juxtapositional lobule cortex       |
| Thalamus                                          | Lateral occipital cortex (superior) |
| Precuneus cortex                                  | Parahippocampal gyrus (posterior)   |
| Intracalcarine cortex                             | Lateral occipital cortex (inferior) |
| Occipital pole                                    |                                     |
| Occipital fusiform gyrus                          |                                     |
| Superior parietal lobule                          |                                     |
| Middle frontal gyrus                              |                                     |
| Precentral gyrus                                  |                                     |
| Central opercular cortex                          |                                     |

| <b>Clustering Coefficient (Rudie et al. 2013)</b> |                                     |
|---------------------------------------------------|-------------------------------------|
| <b>Left Hemisphere</b>                            | <b>Right Hemisphere</b>             |
| Cingulate gyrus (anterior)                        | Precentral gyrus                    |
| Postcentral gyrus                                 | Precentral gyrus                    |
| Cuneus cortex                                     | Lateral occipital cortex (superior) |
| Lingual gyrus                                     | Precuneus cortex                    |
| Parahippocampal gyrus (anterior)                  | Precuneus cortex                    |
| Occipital fusiform gyrus                          | Temporal occipital fusiform         |
| Superior parietal lobule                          | Middle temporal gyrus (posterior)   |
| Insular cortex                                    | Middle temporal gyrus (posterior)   |
| Precentral gyrus                                  |                                     |
| Frontal pole                                      |                                     |
| Central opercular cortex                          |                                     |
| Planum temporale                                  |                                     |
